# Supplementary material for: Mesospheric gravity wave activity estimated via airglow imagery, multistatic meteor radar, and SABER data taken during the SIMONe–2018 campaign
Source: Copernicus journal article supplement (doi:10.5194/acp-21-13631-2021), 2021-09-13

O2 keograms – pre-processed images

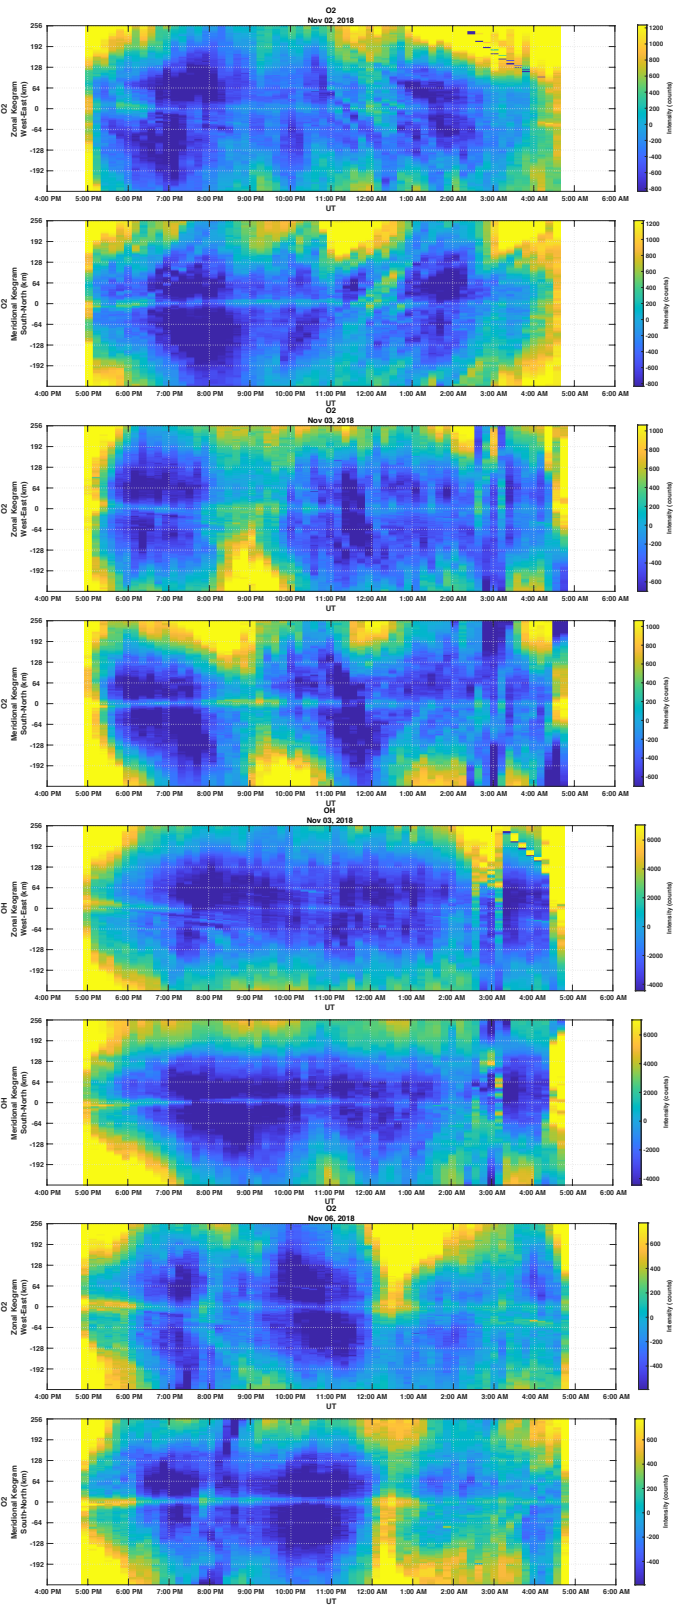

O2 keograms – time-difference images

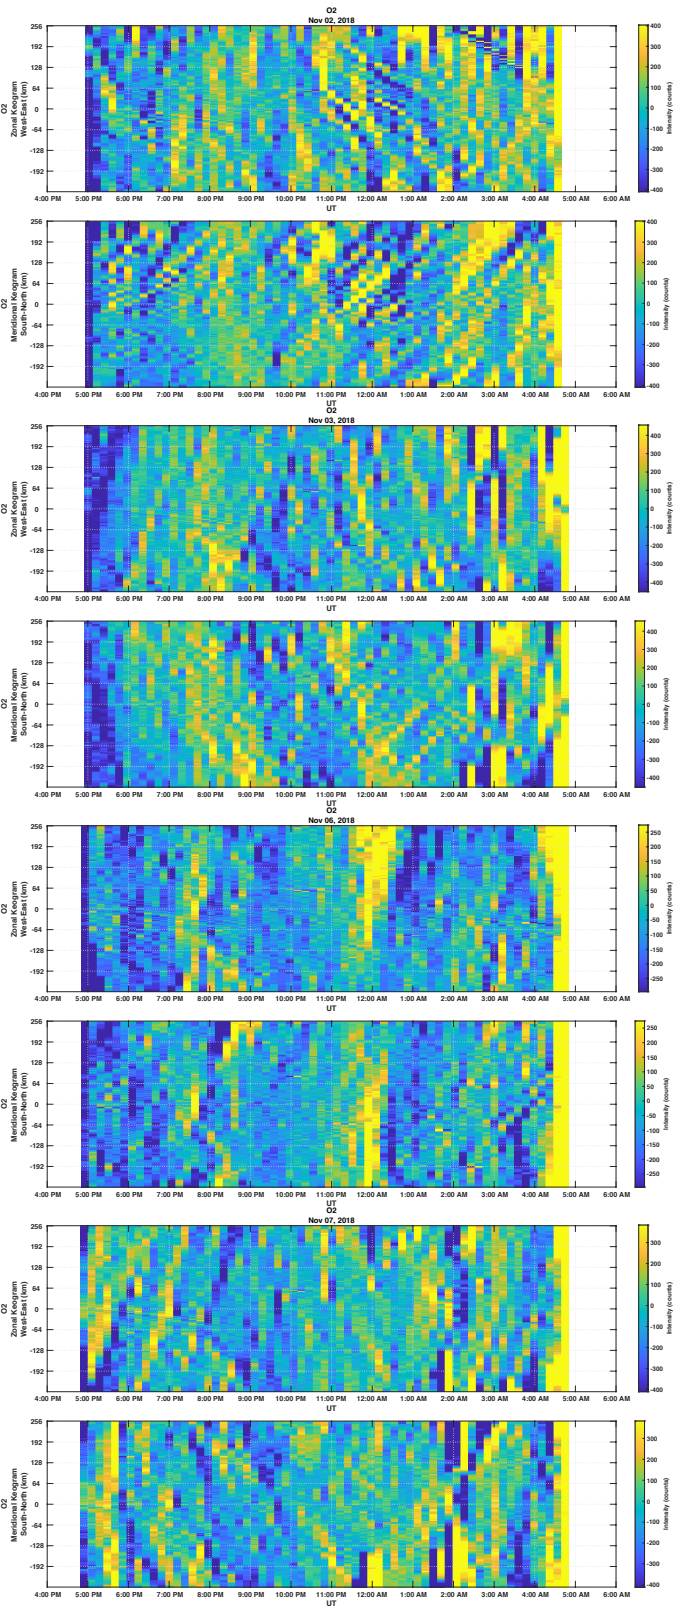

OH keograms – pre-processed images

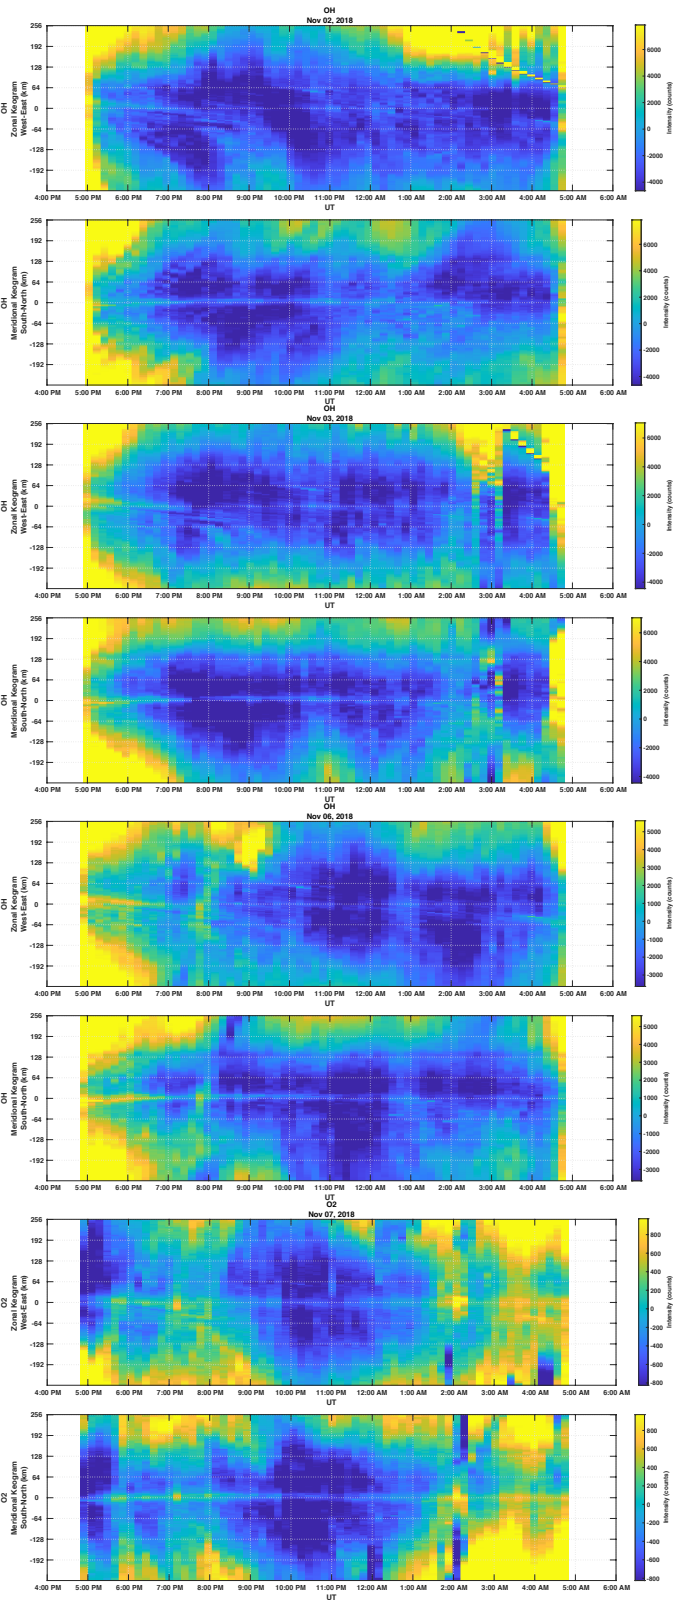

OH keograms – time-difference images

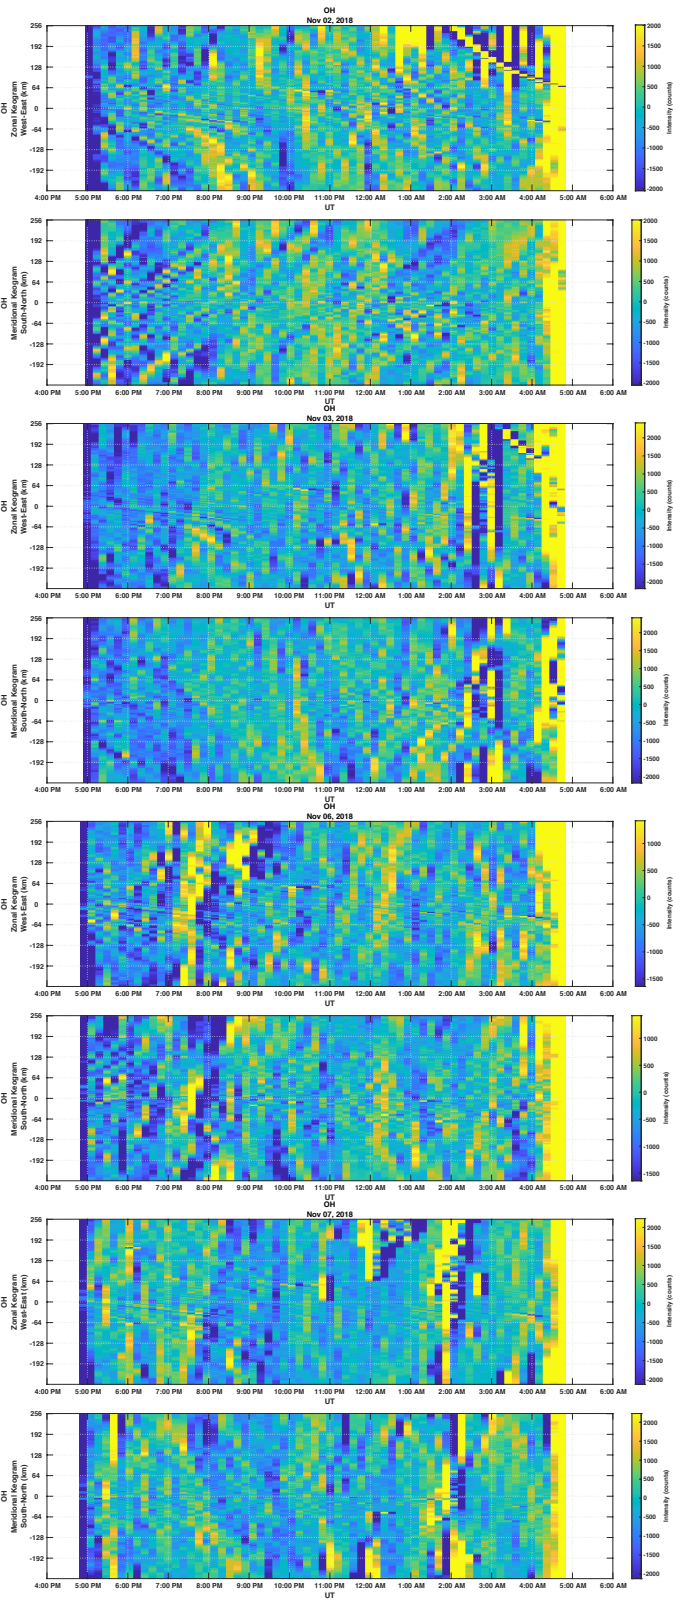



NaD keograms – pre-processed images

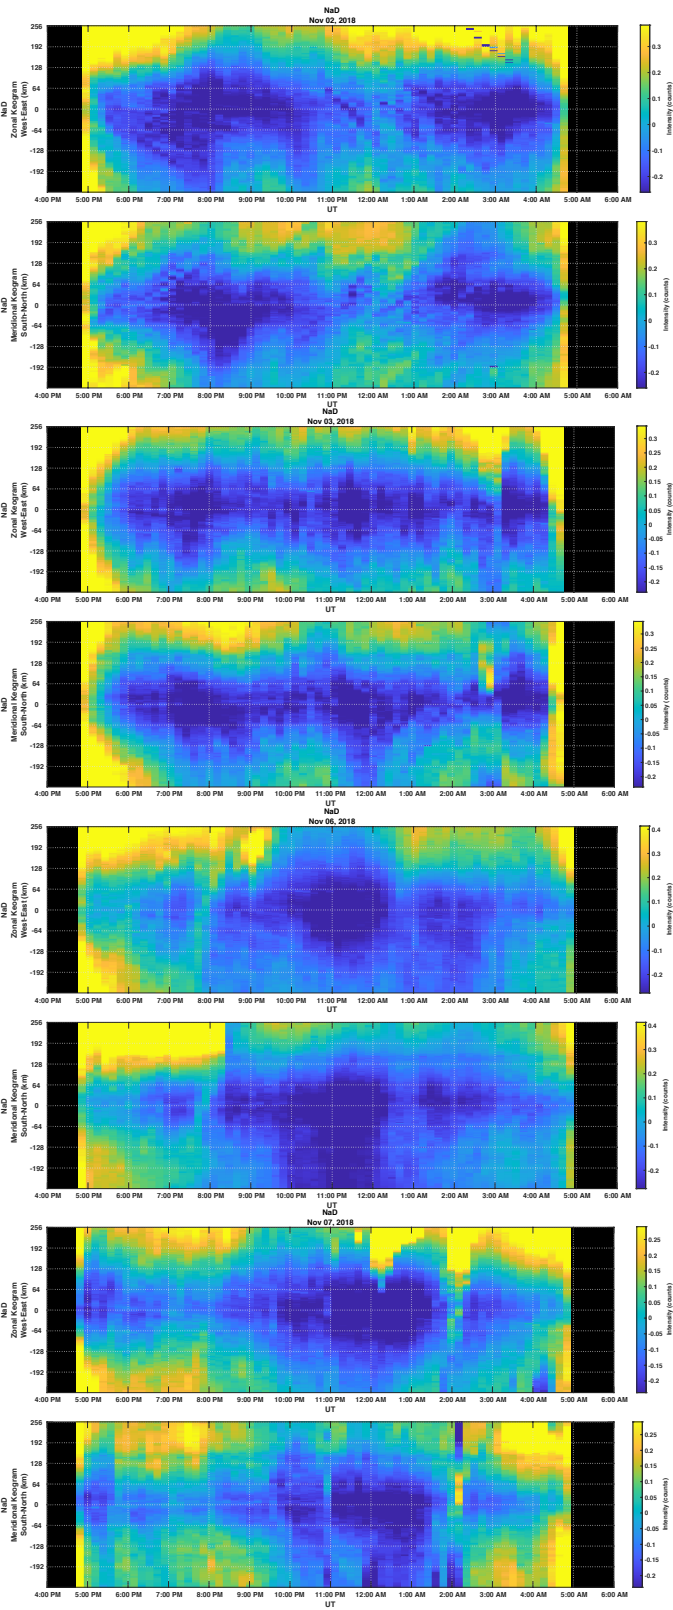

NaD keograms – time-difference images

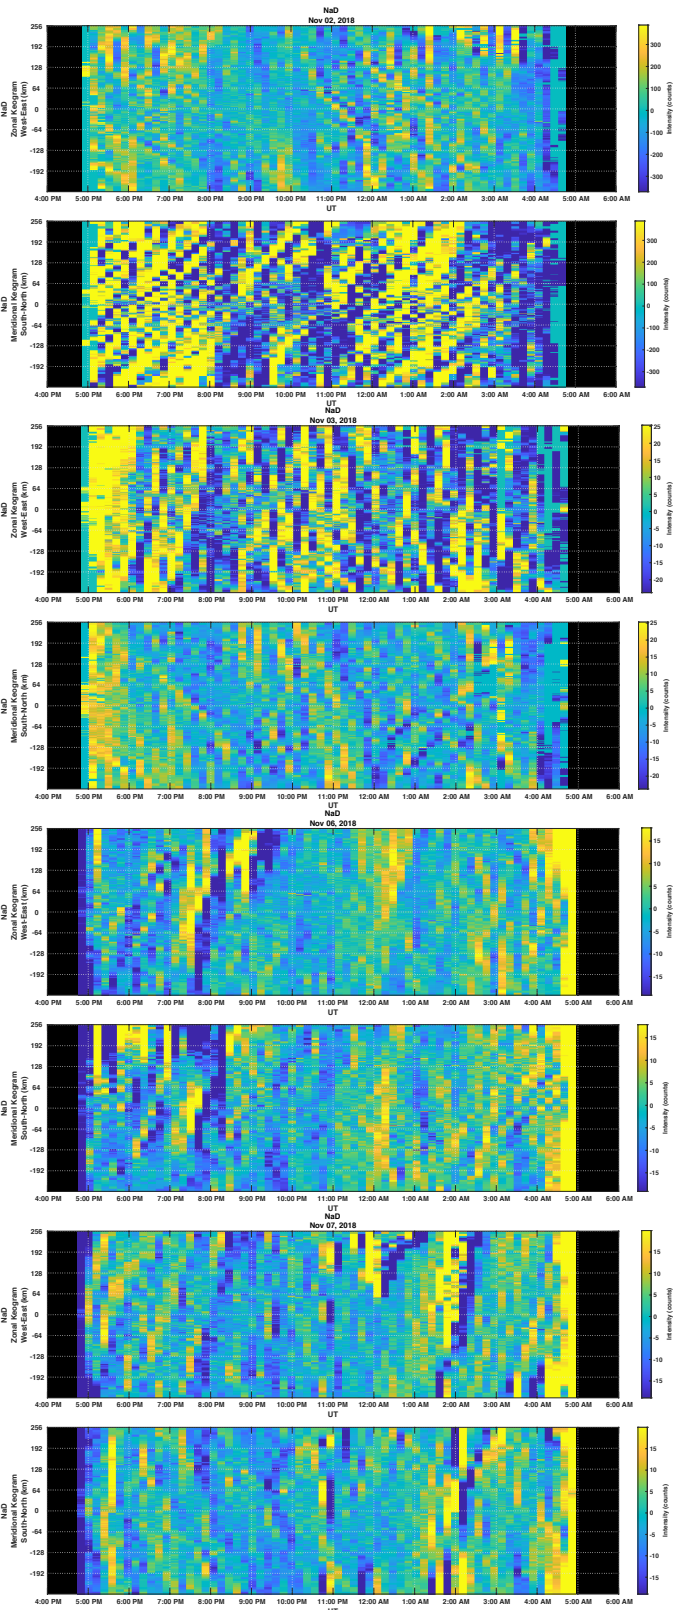

Supplement: Supplementary file 2 [file acp-21-13631-2021-supplement.zip]
