# Supplementary material for: Mesospheric gravity wave activity estimated via airglow imagery, multistatic meteor radar, and SABER data taken during the SIMONe–2018 campaign
Source: Copernicus journal article supplement (doi:10.5194/acp-21-13631-2021), 2021-09-13
Supplement: Supplementary file 4 [file acp-21-13631-2021-supplement.zip]

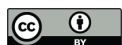

*Supplement of*

**Mesospheric gravity wave activity estimated via airglow imagery, multistatic meteor radar, and SABER data taken during the SIMONe–2018 campaign**

**Fabio Vargas et al.**

*Correspondence to:* Fabio Vargas (fvargas@illinois.edu)

- acp-21-13631-2021-supplement-title-page.pdf
- \_\_MACOSX
  - .\_supplementary info - hf AGWs.pdf
  - .\_supplementary info - keograms.pdf
- supplementary info - hf AGWs.pdf
- supplementary info - keograms.pdf

The copyright of individual parts of the supplement might differ from the article licence.
